# Supplementary material for: 100 YEARS OF VITAMIN D: Effect of serum vitamin D level before ovarian stimulation on the cumulative live birth rate of women undergoing in vitro fertilization: a retrospective analysis
Source: PubMed Central journal article supplement — Endocr Connect. 2022 Jan 14;11(2):e210444. doi: 10.1530/EC-21-0444 (PMC8859949; doi:10.1530/ec-21-0444), 2022-01-14
Supplement: supplementary_table_1.pdf [file supplementary_table_1.pdf]

**Table S1. Outcomes of IVF using the IOM Guidelines cut-off**

|                                                  | Vitamin D<br><30 nmol/L | 30nmol/L ≤ Vitamin D<br>< 50 nmol/L | Vitamin D<br>≥75 nmol/L | P values# |
|--------------------------------------------------|-------------------------|-------------------------------------|-------------------------|-----------|
| Fresh CPR per<br>cycle started                   | 25/70<br>(35.7%)        | 138/427<br>(32.3%)                  | 236/681<br>(34.7%)      | 0.682     |
| Fresh CPR per<br>transfer                        | 25/61<br>(41.0%)        | 138/314<br>(43.9%)                  | 236/523<br>(45.1%)      | 0.536     |
| Fresh on-going<br>pregnancy rate<br>per transfer | 23/61<br>(37.7%)        | 120/314<br>(38.2%)                  | 199/523<br>(38.0%)      | 0.996     |
| Fresh LBR per<br>transfer                        | 22/61<br>(36.1%)        | 117/314<br>(37.3%)                  | 192/523<br>(36.7%)      | 0.974     |
| CLBR                                             | 28/69<br>(40.6%)        | 180/405<br>(44.4%)                  | 325/639<br>(50.9%)      | 0.018*    |
| Miscarriage rate<br>per fresh transfer           | 3/27<br>(11.1%)         | 29/151<br>(19.2%)                   | 50/252<br>(19.8%)       | 0.413     |

<sup>a</sup>Data shown represent the number (%).

\*statistically significant, #analysed by Chi-Square test for trend
